# Supplementary material for: Herpes Simplex Virus 1 UL2 Inhibits the TNF-α–Mediated NF-κB Activity by Interacting With p65/p50
Source: PubMed Central journal article supplement (PMC7237644; doi:10.3389/fimmu.2020.00549), 2020-05-13

## Original western blot results of Fig. 1

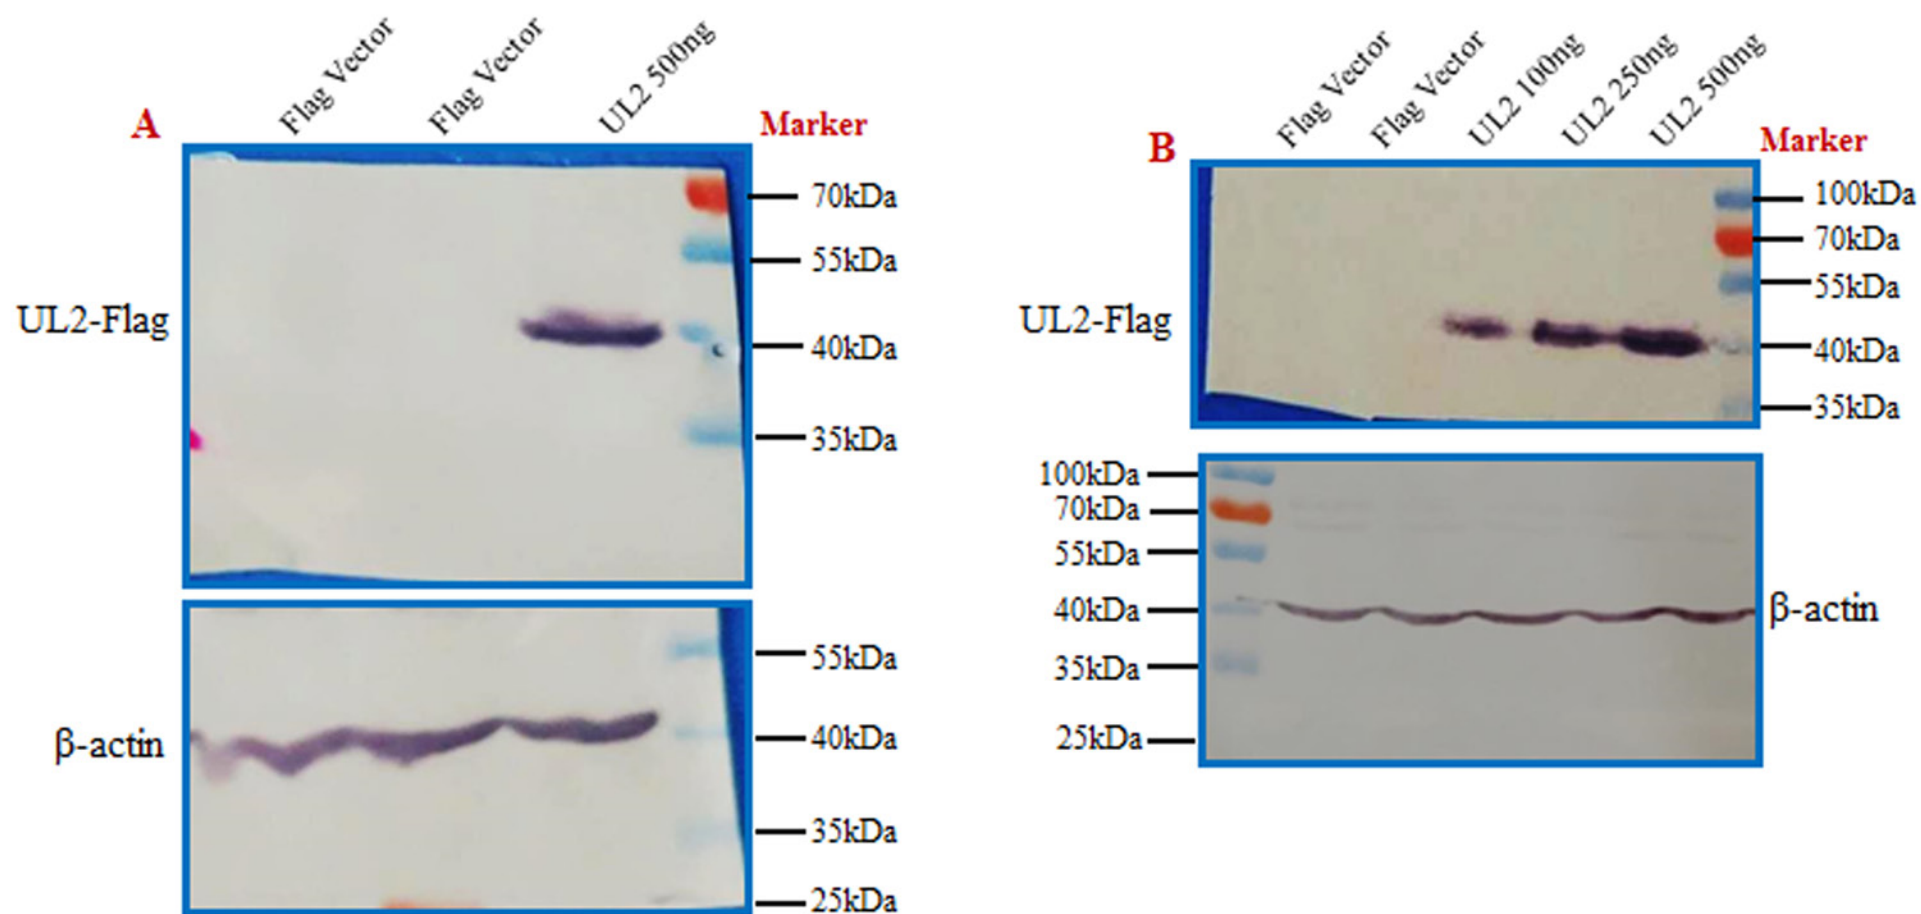

## Original western blot results of Fig. 2

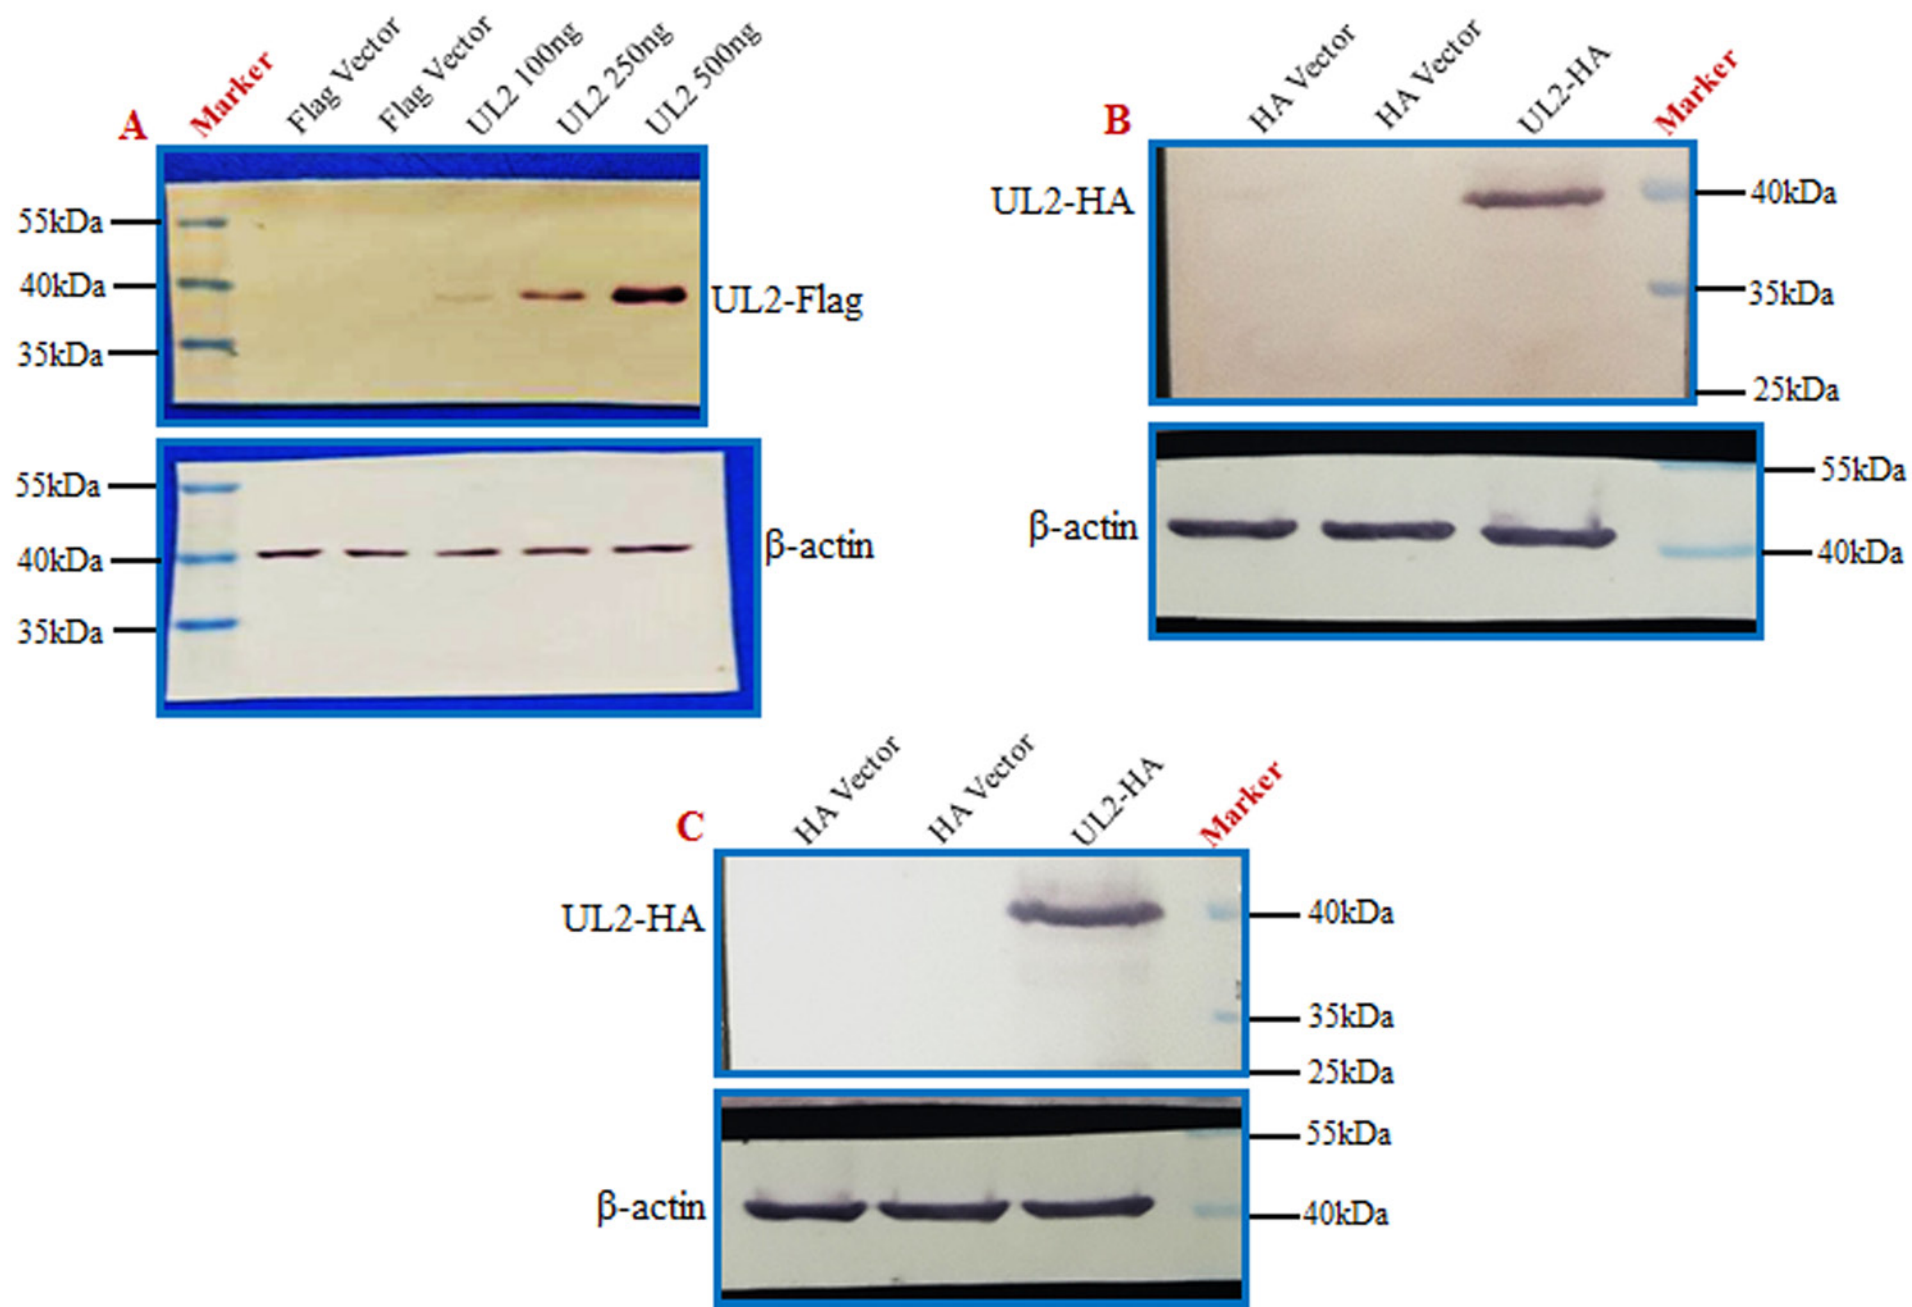

## Original western blot results of Fig. 3

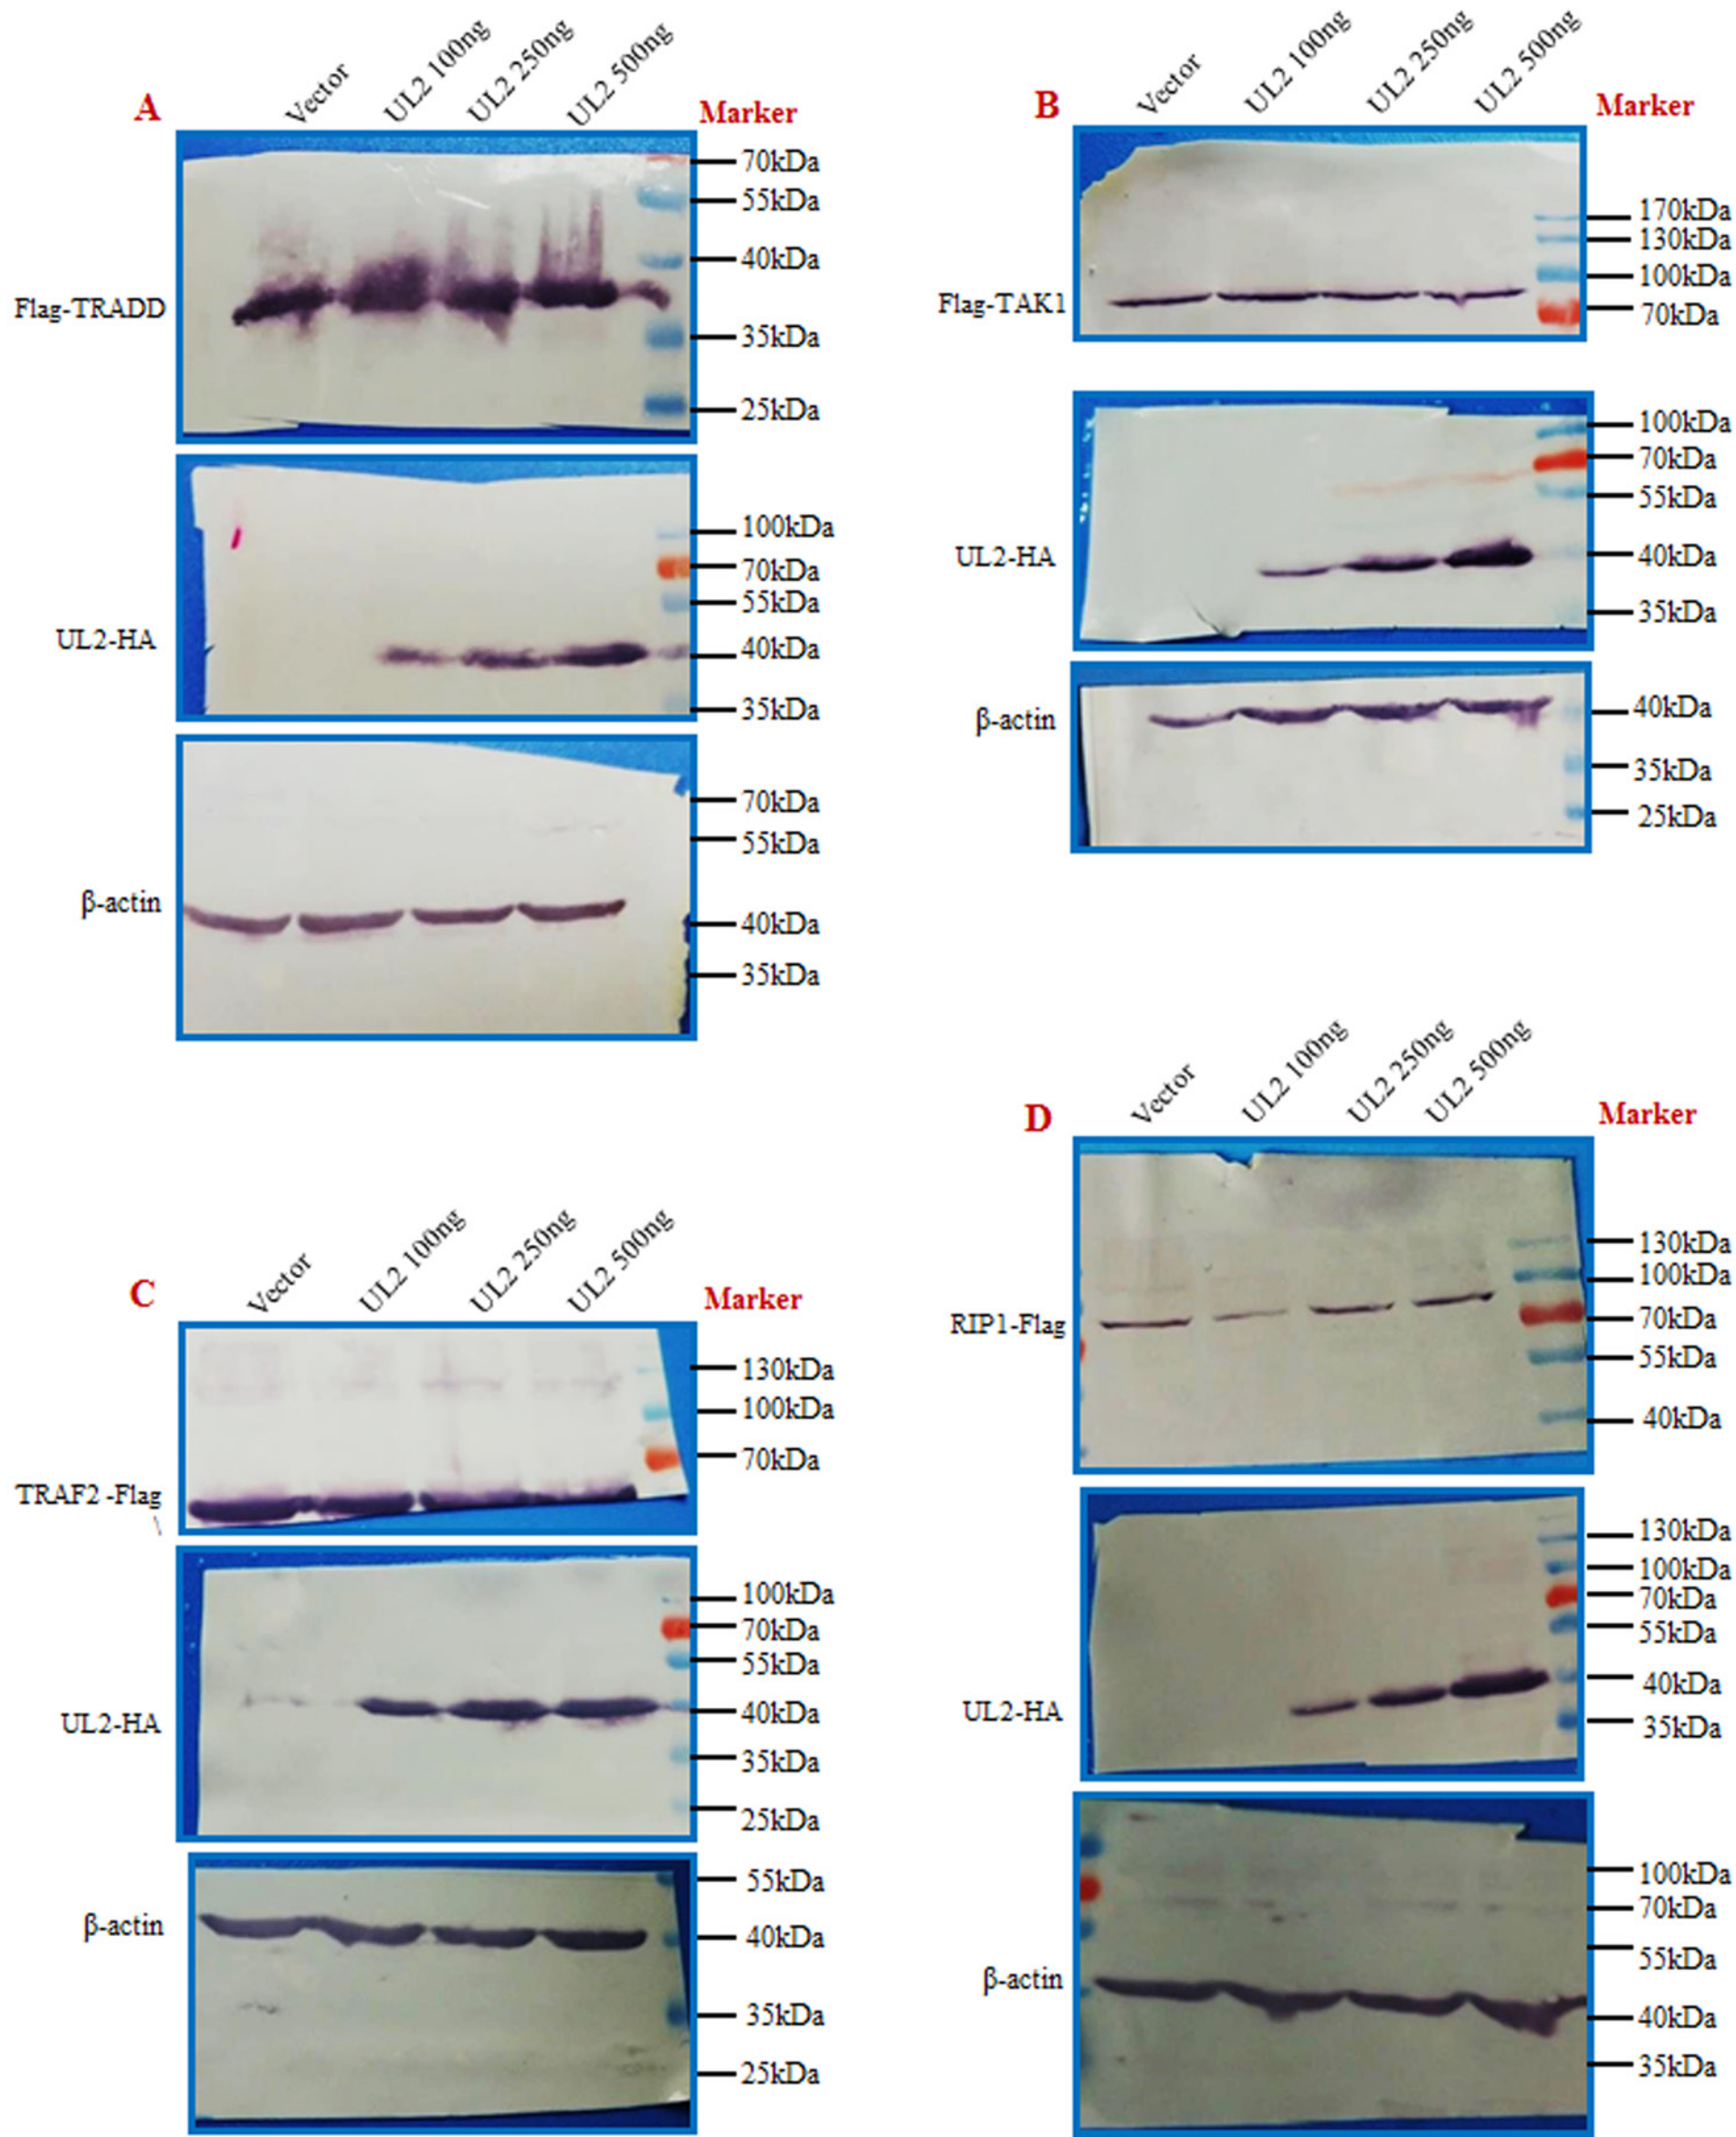

# Original western blot results of Fig. 3

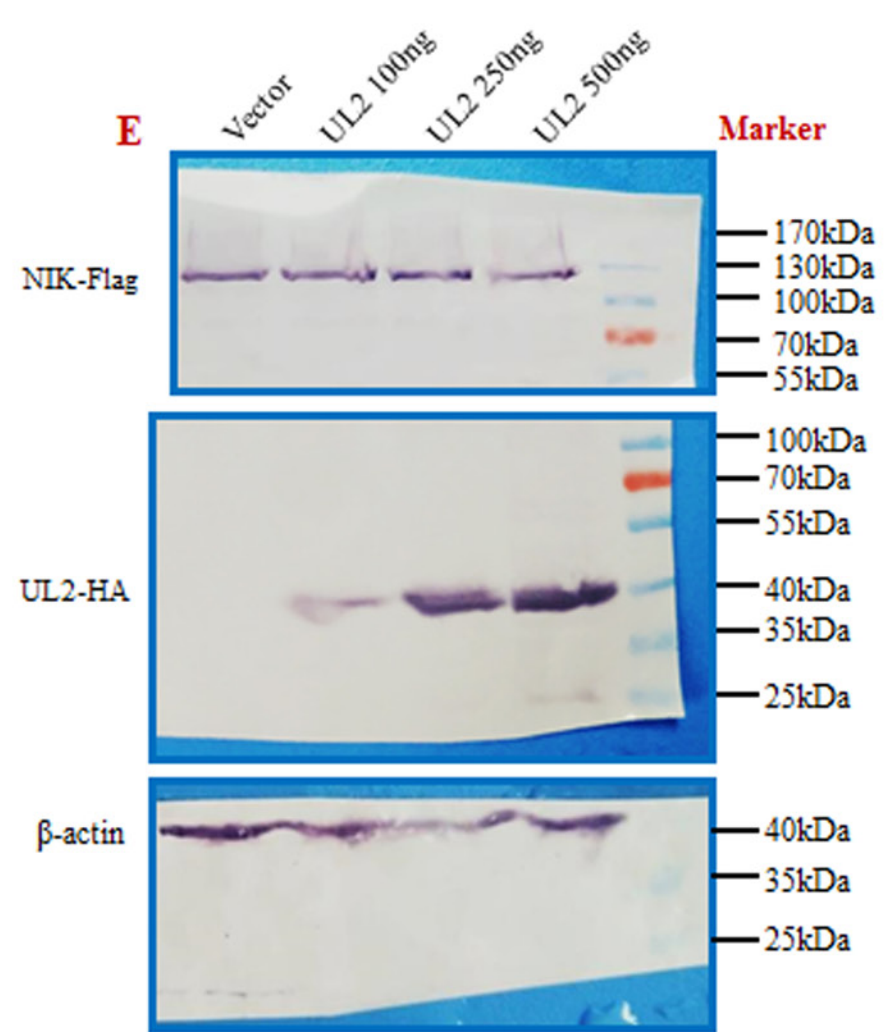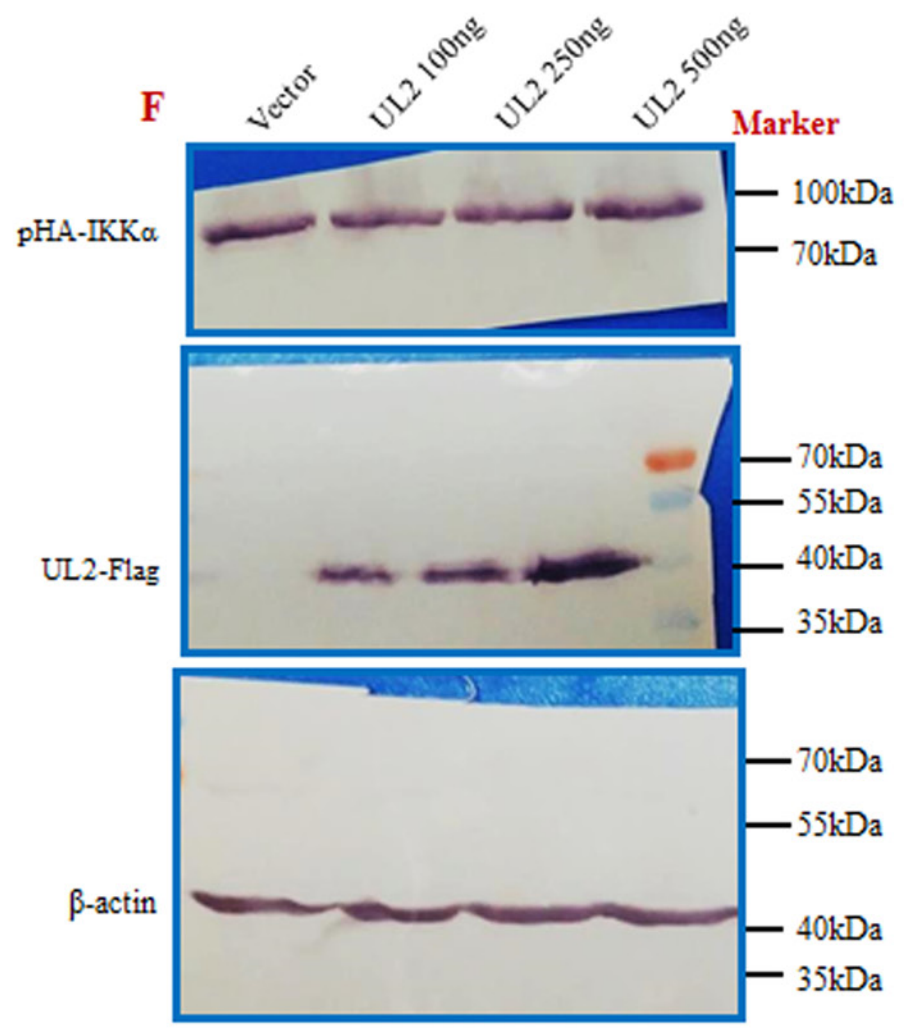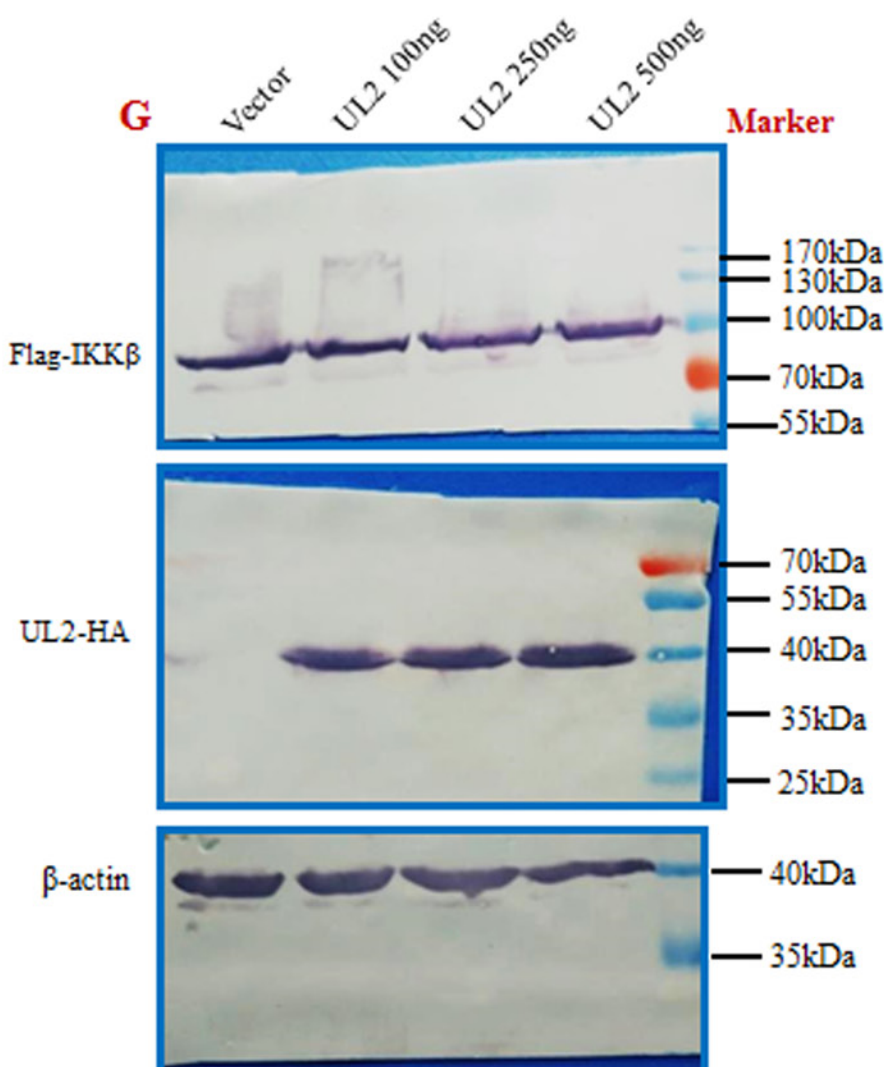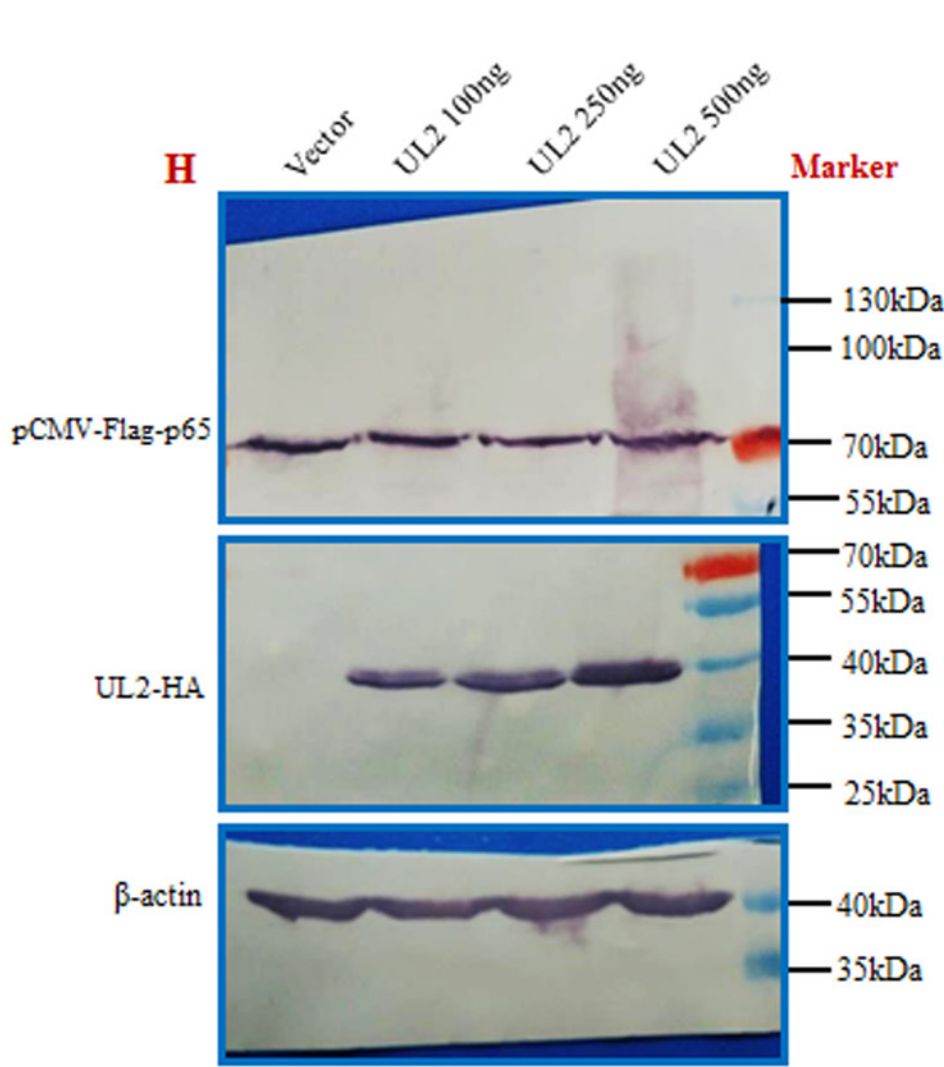

# Original western blot results of Fig. 4

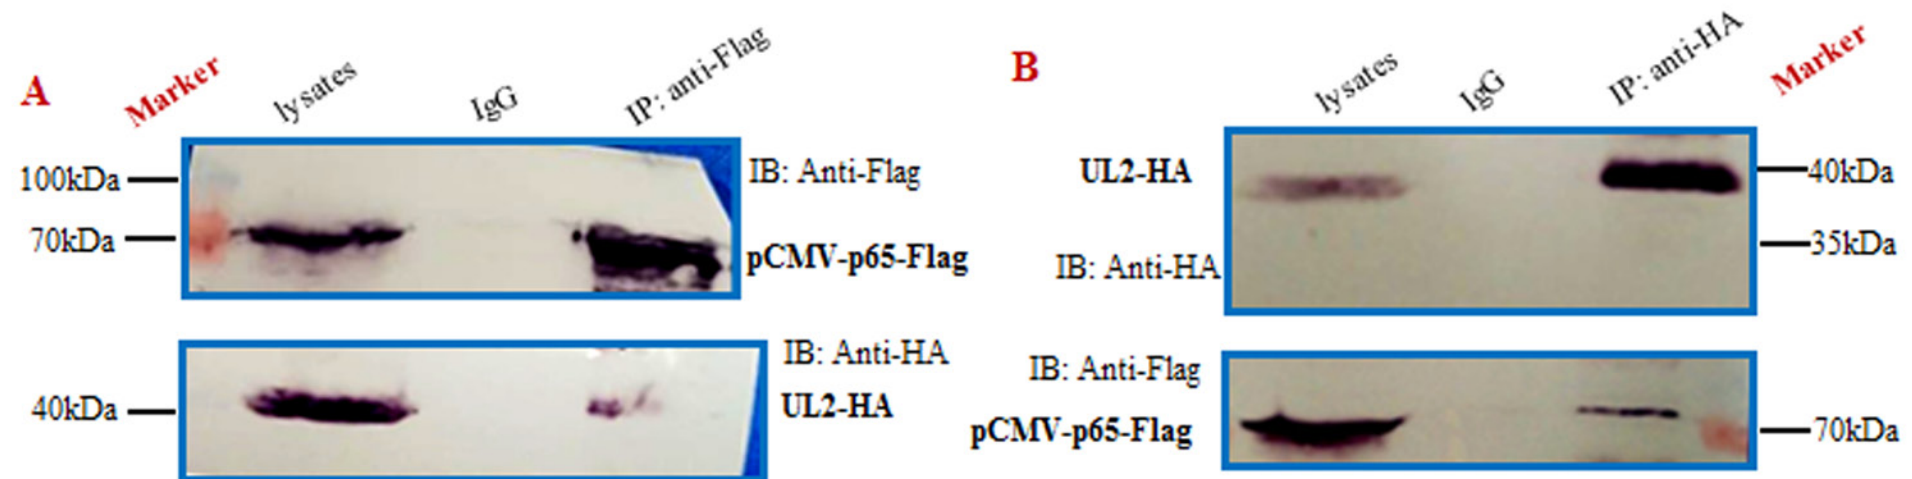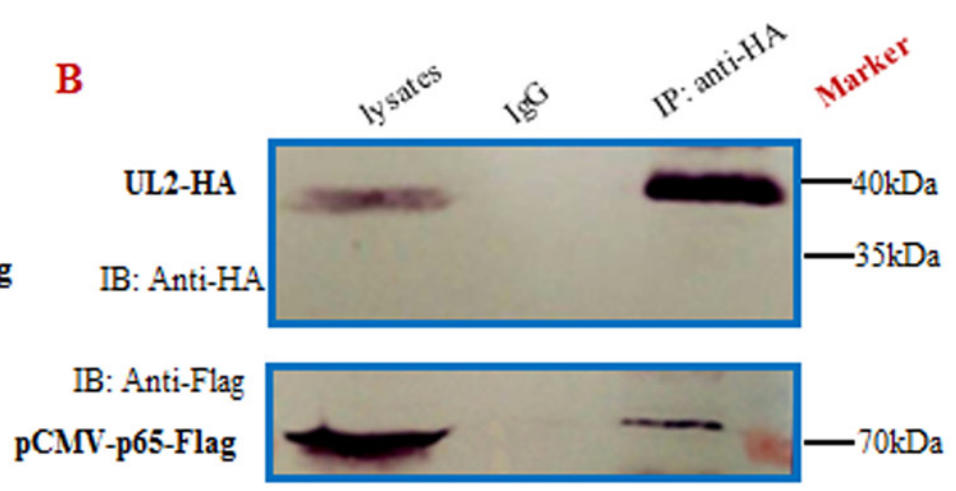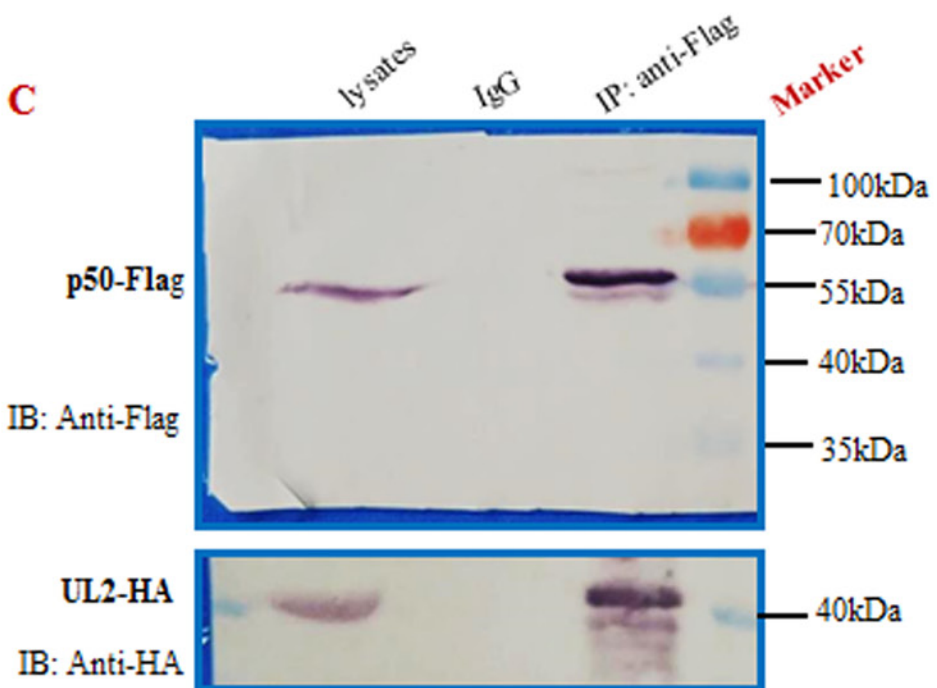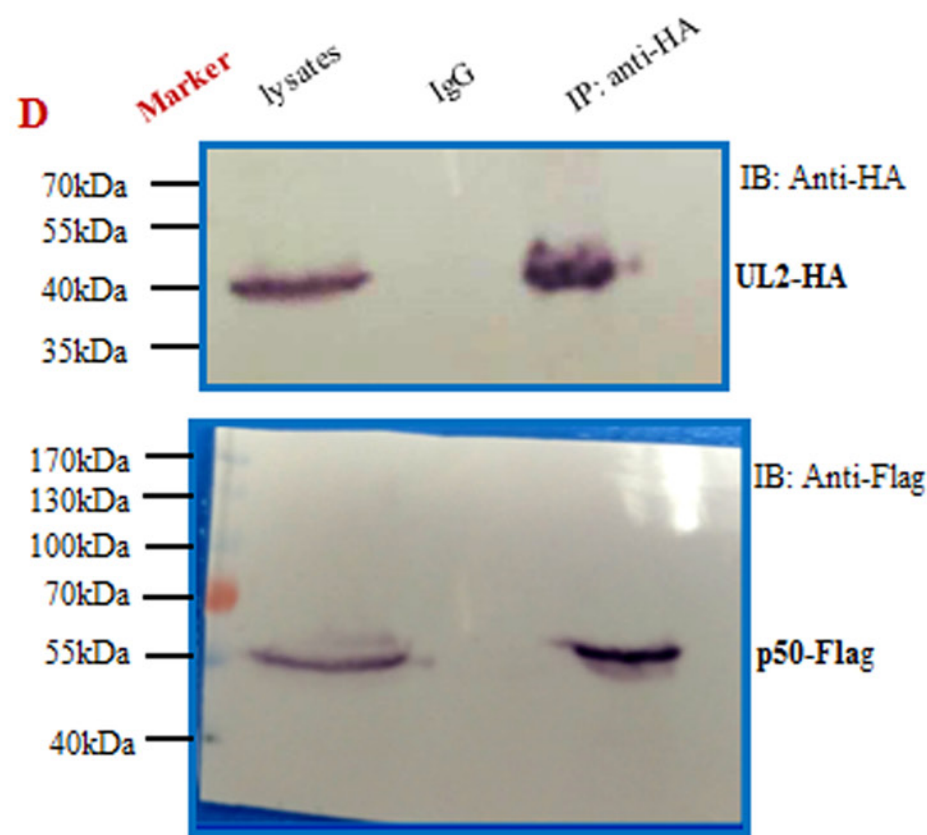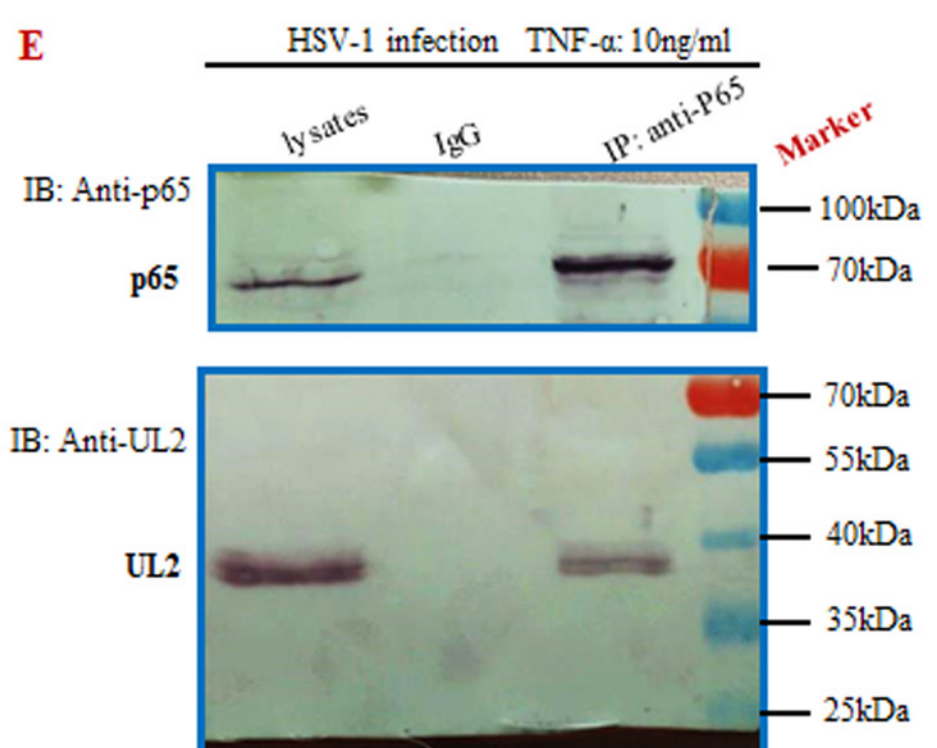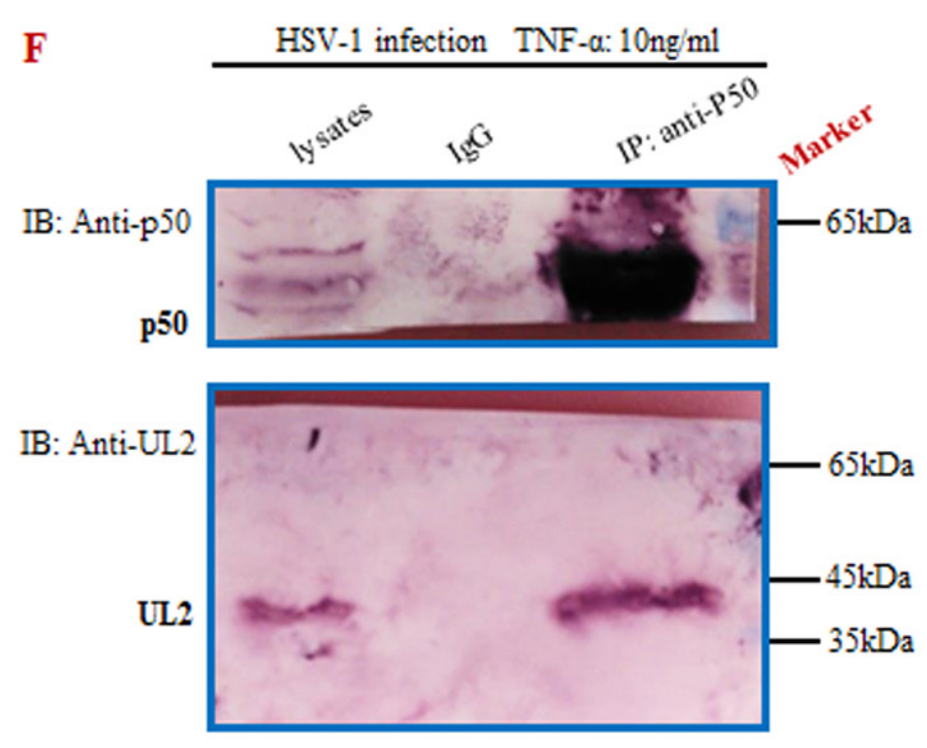

# Original western blot results of Fig. 5

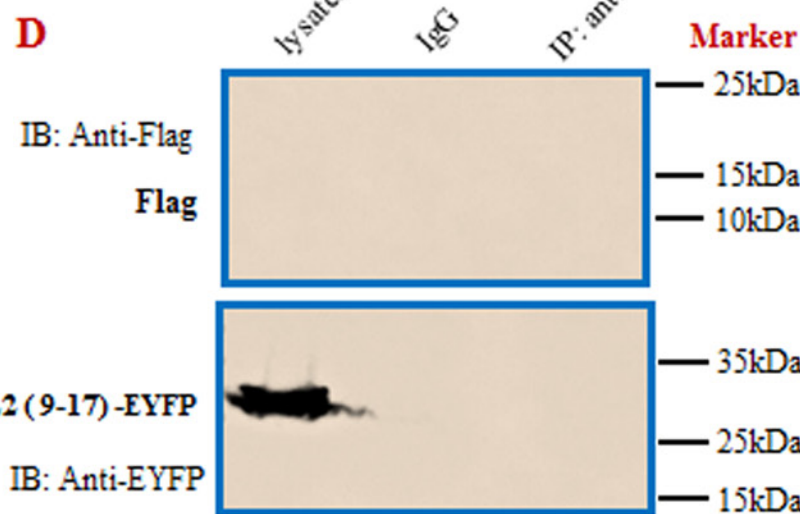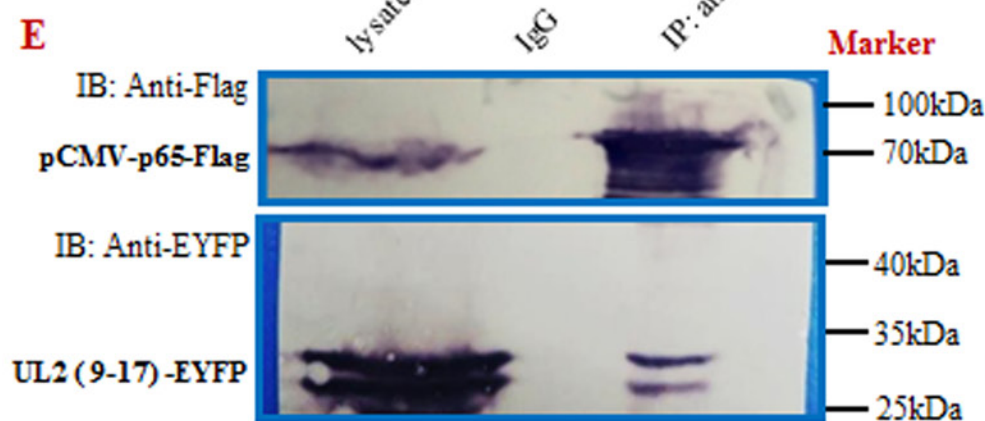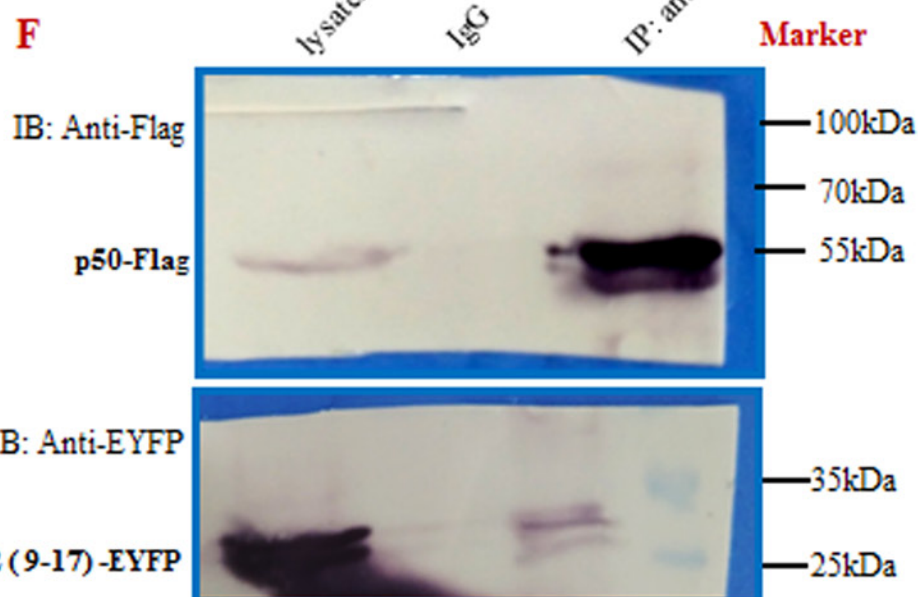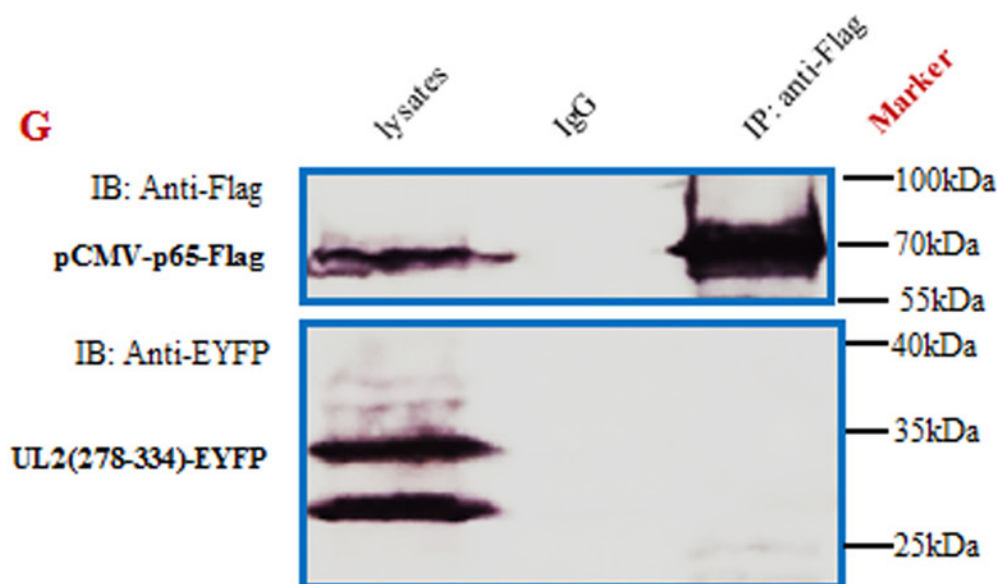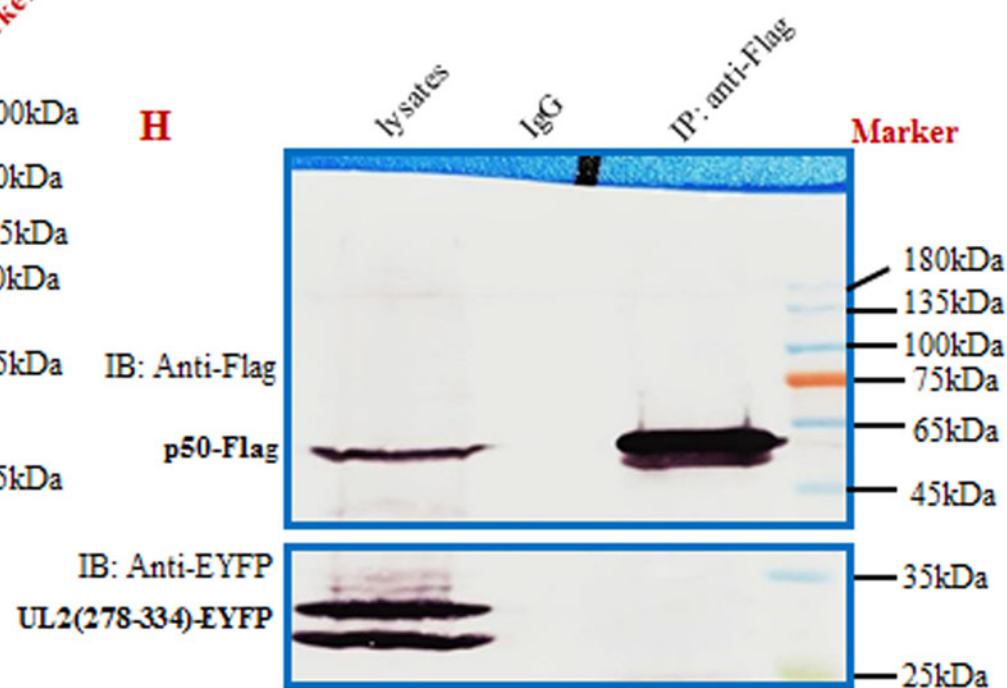

## Original western blot results of Fig. 5

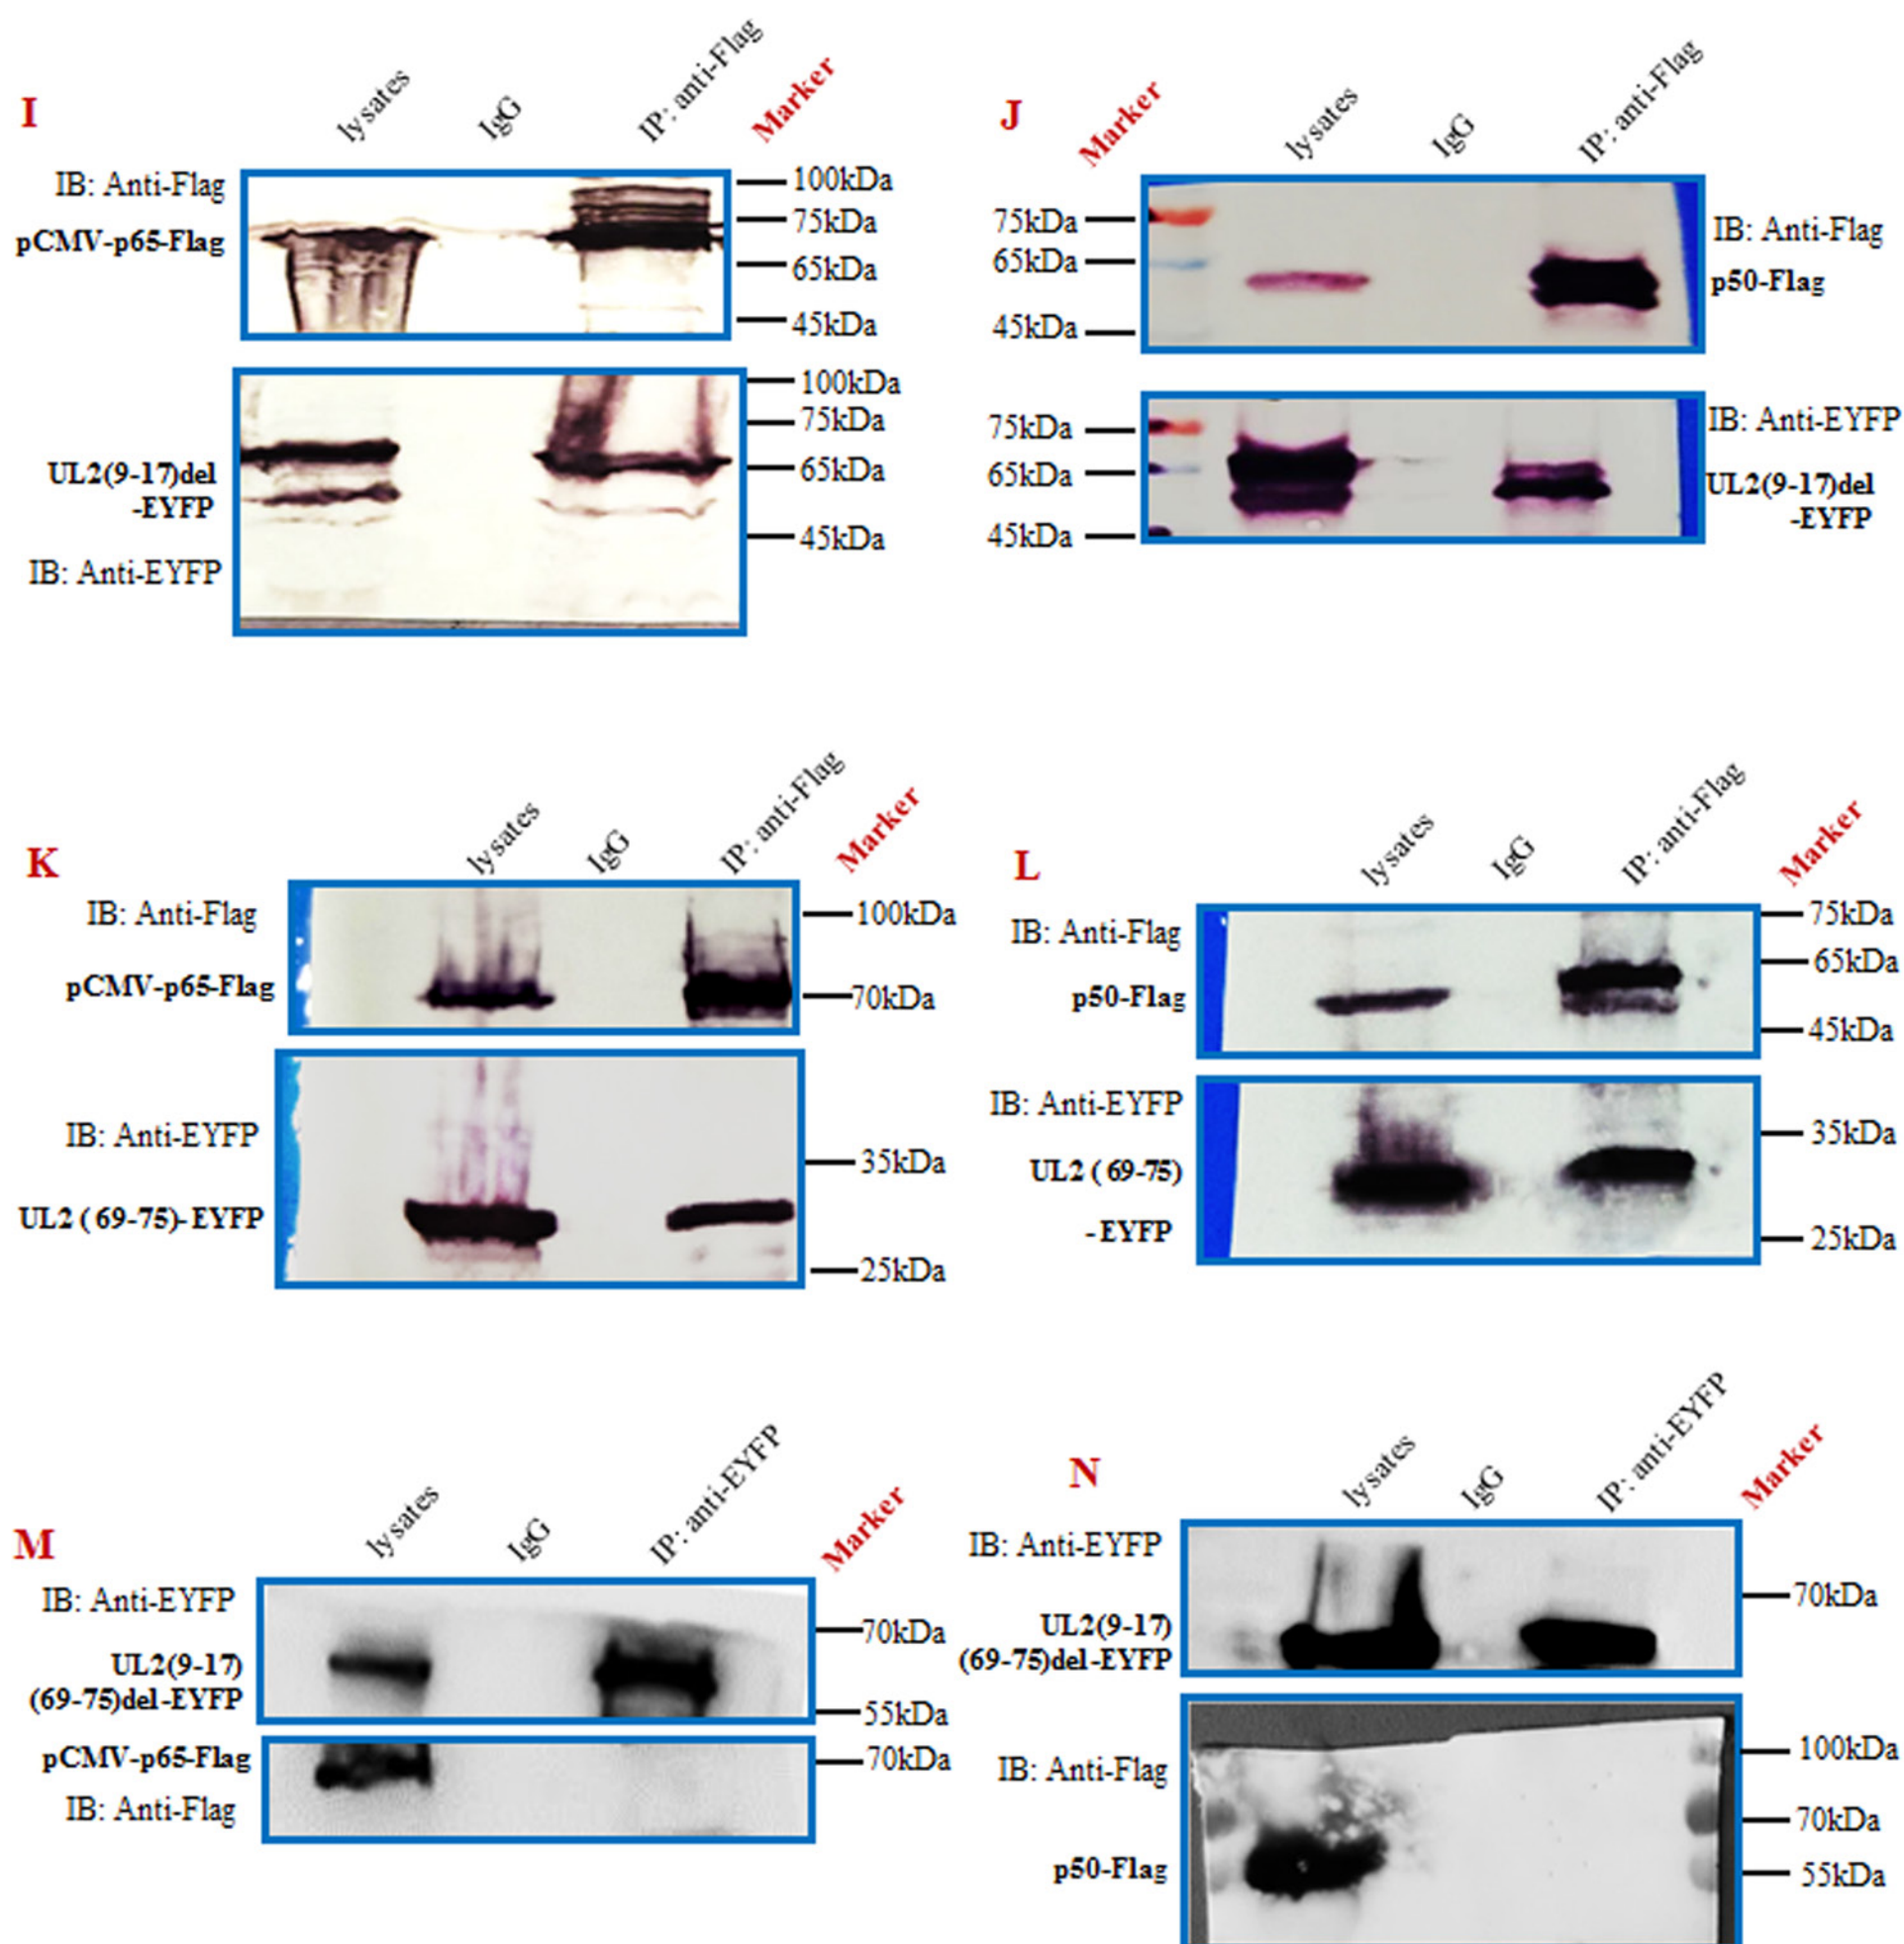

# Original western blot results of Fig. 6

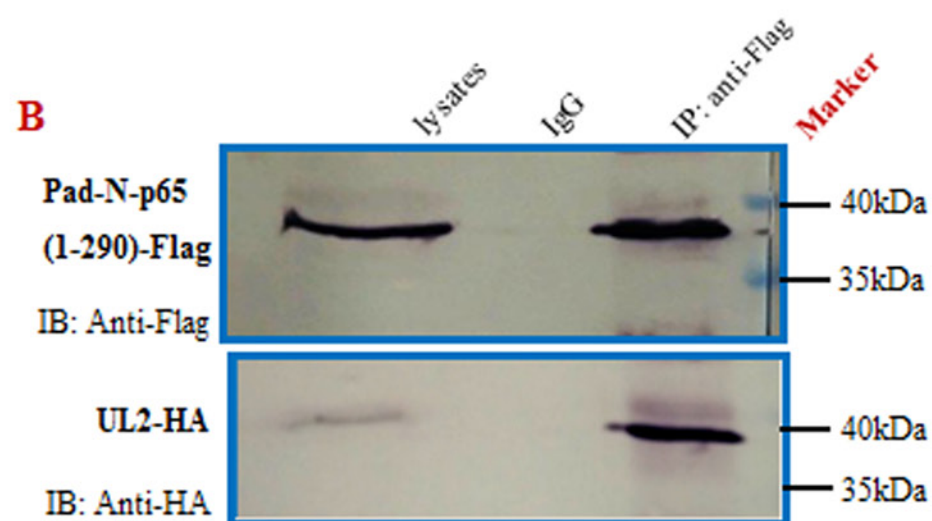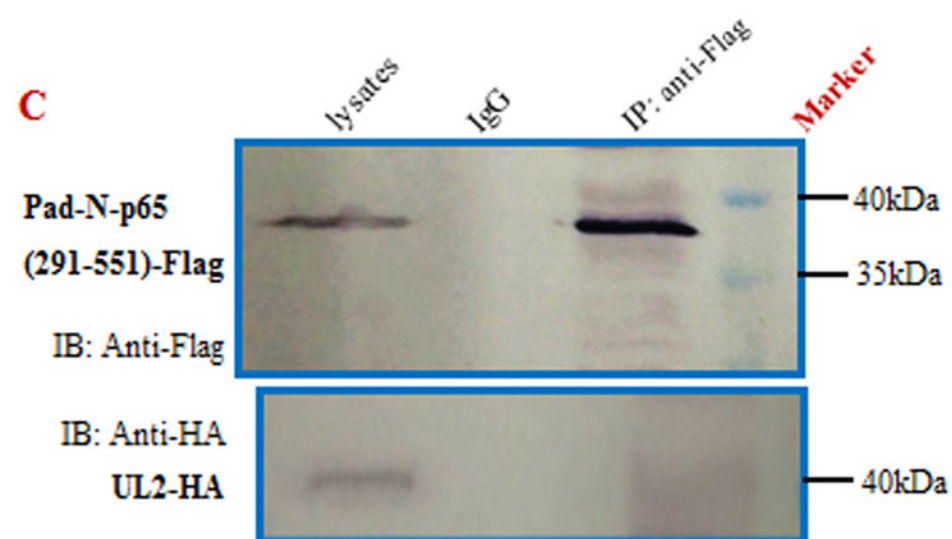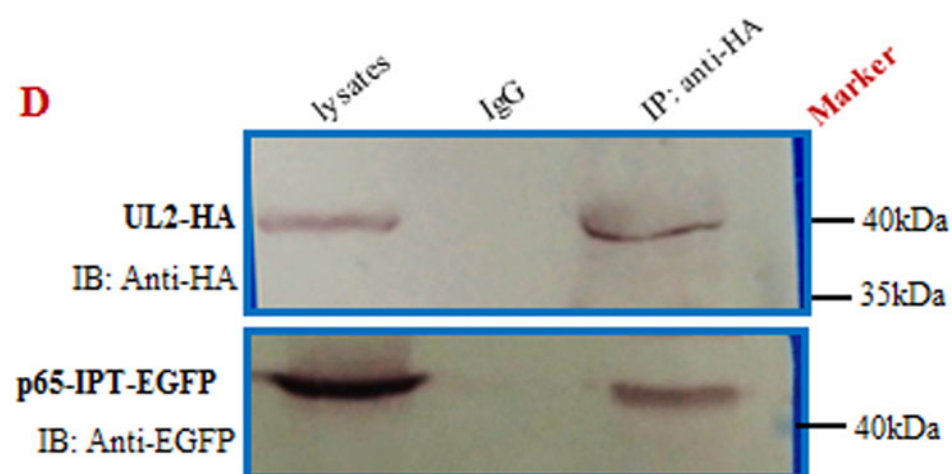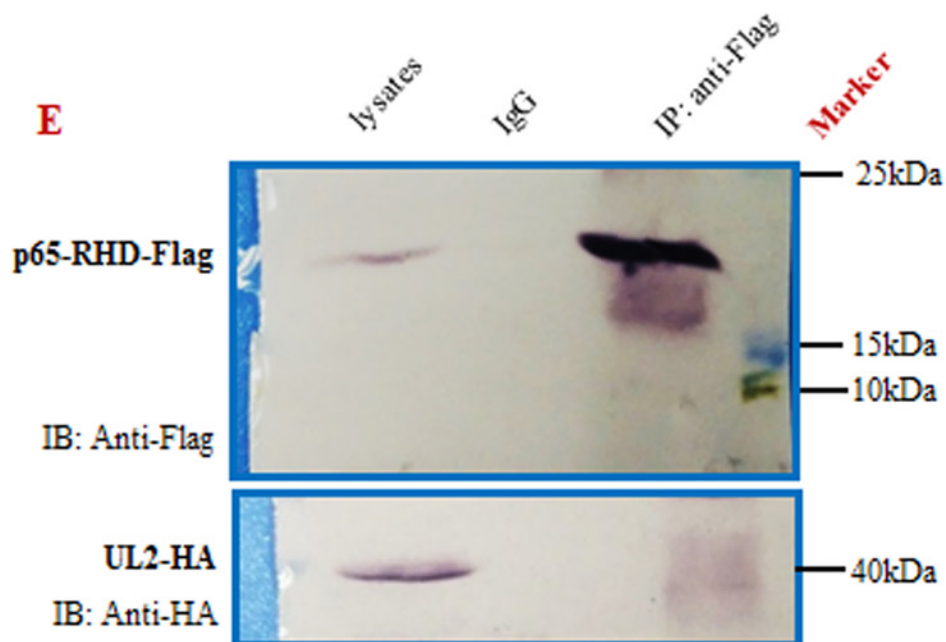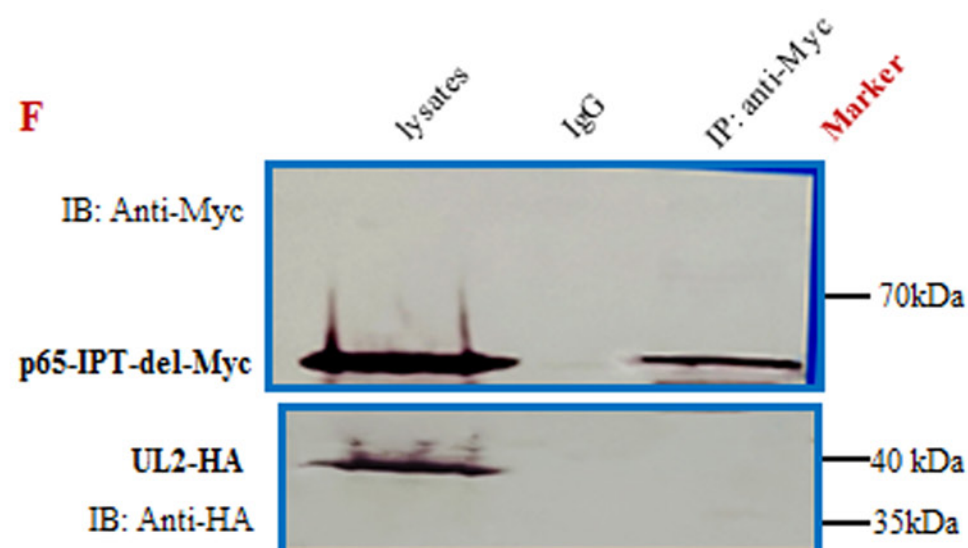



# Original western blot results of Fig. 6

**G**

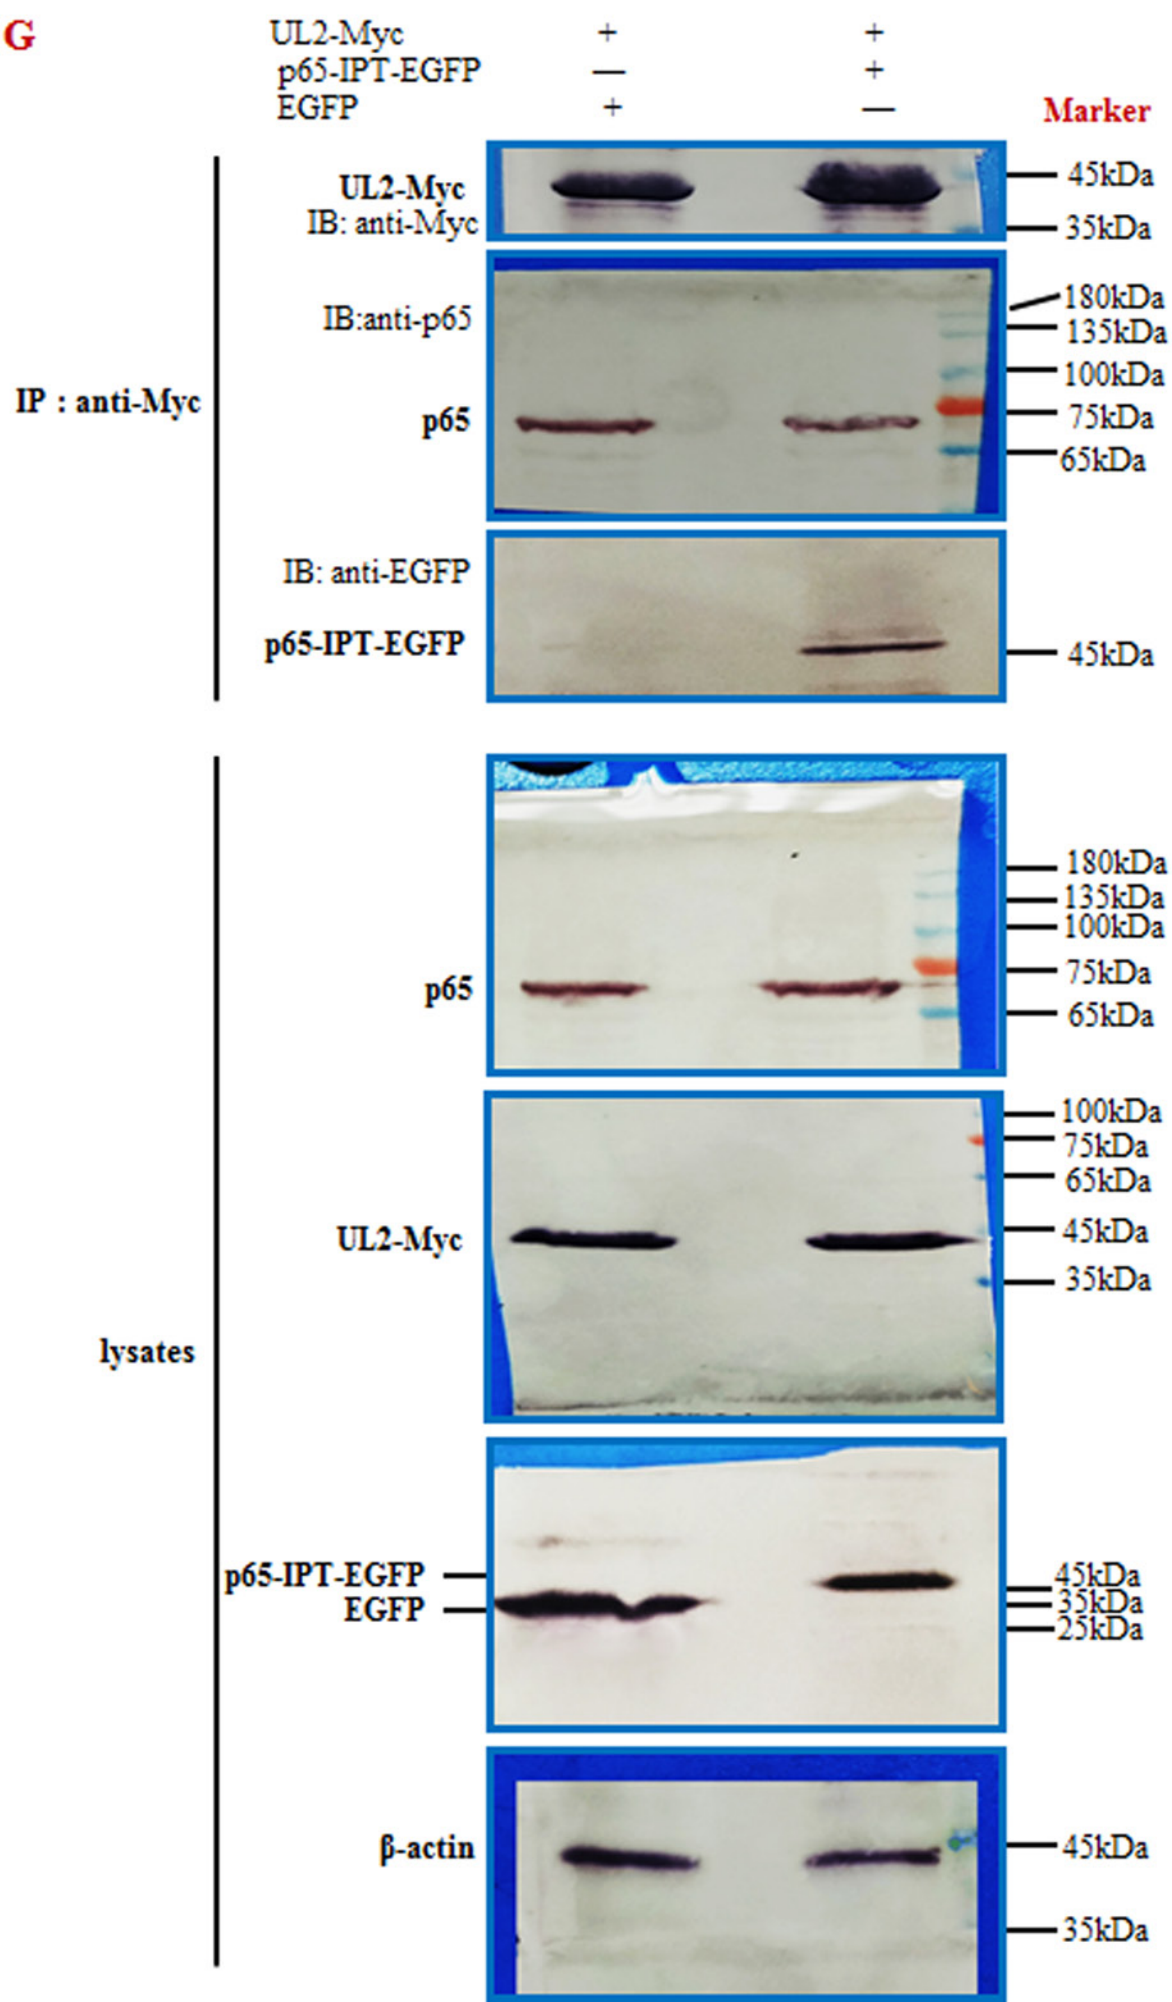

# Original western blot results of Fig. 7

**A**

**IP: Flag**

HA Vector      UL2-HA      **Marker**

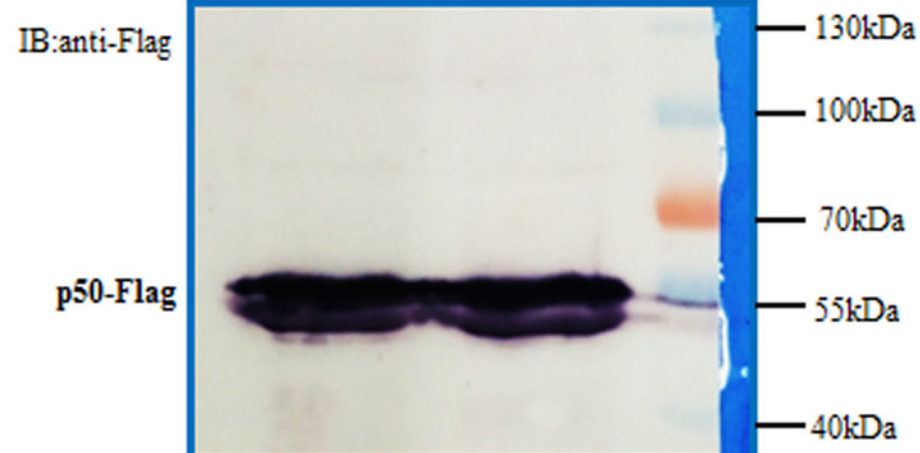

**lysates**

HA Vector      UL2-HA      **Marker**

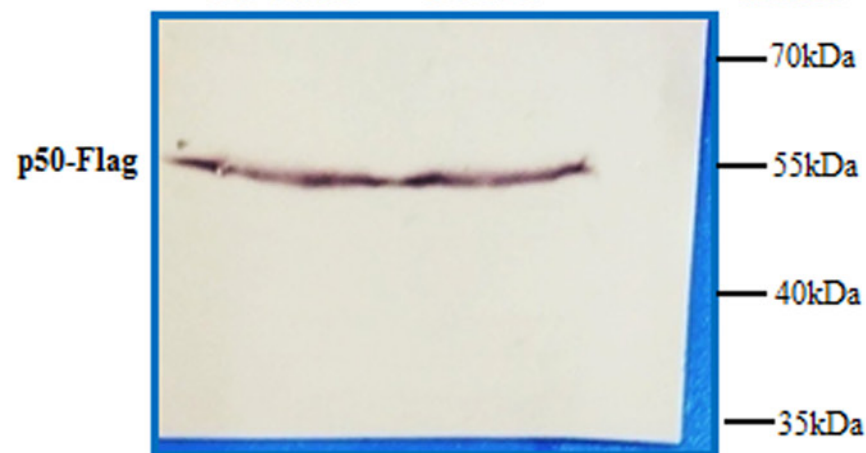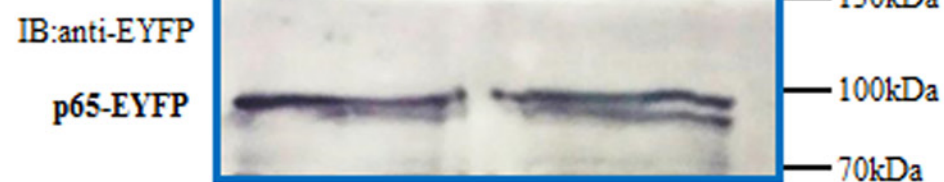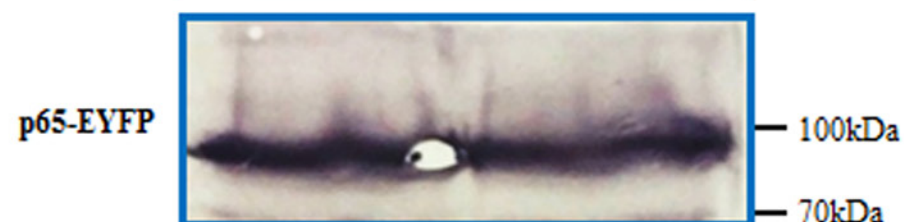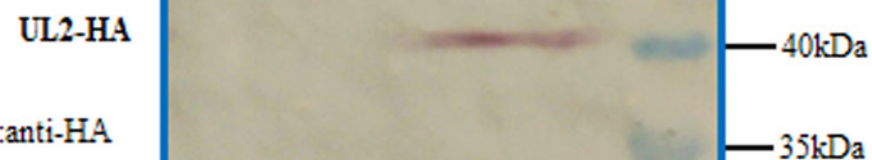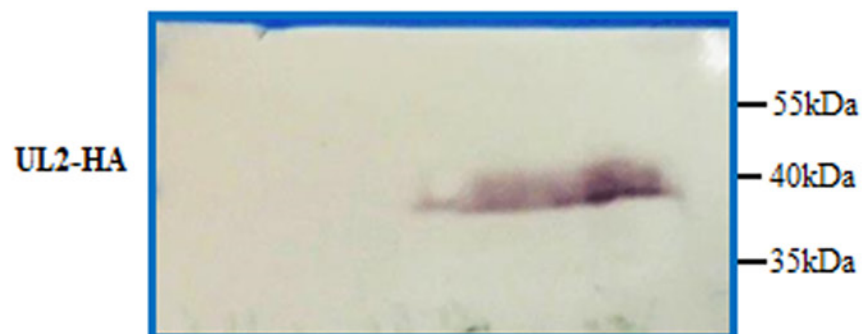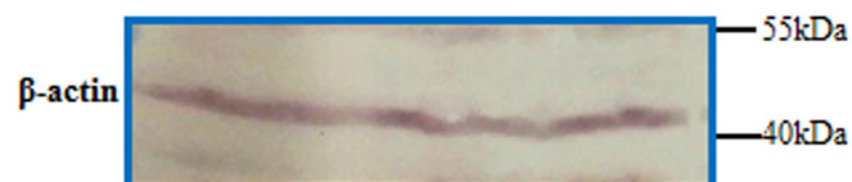

# Original western blot results of Fig. 9

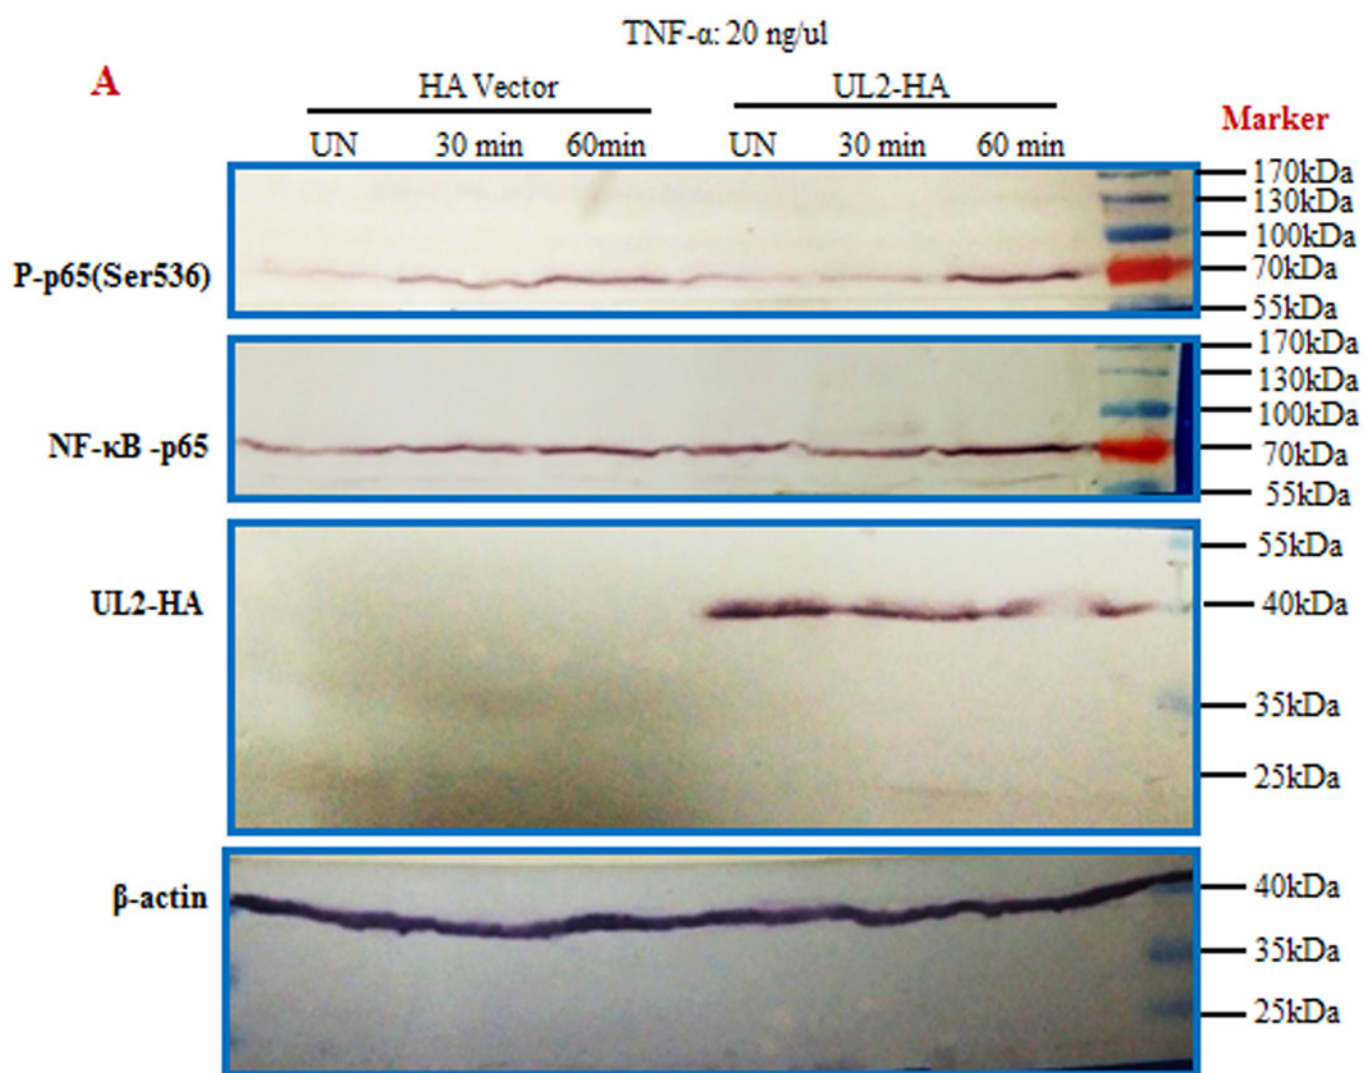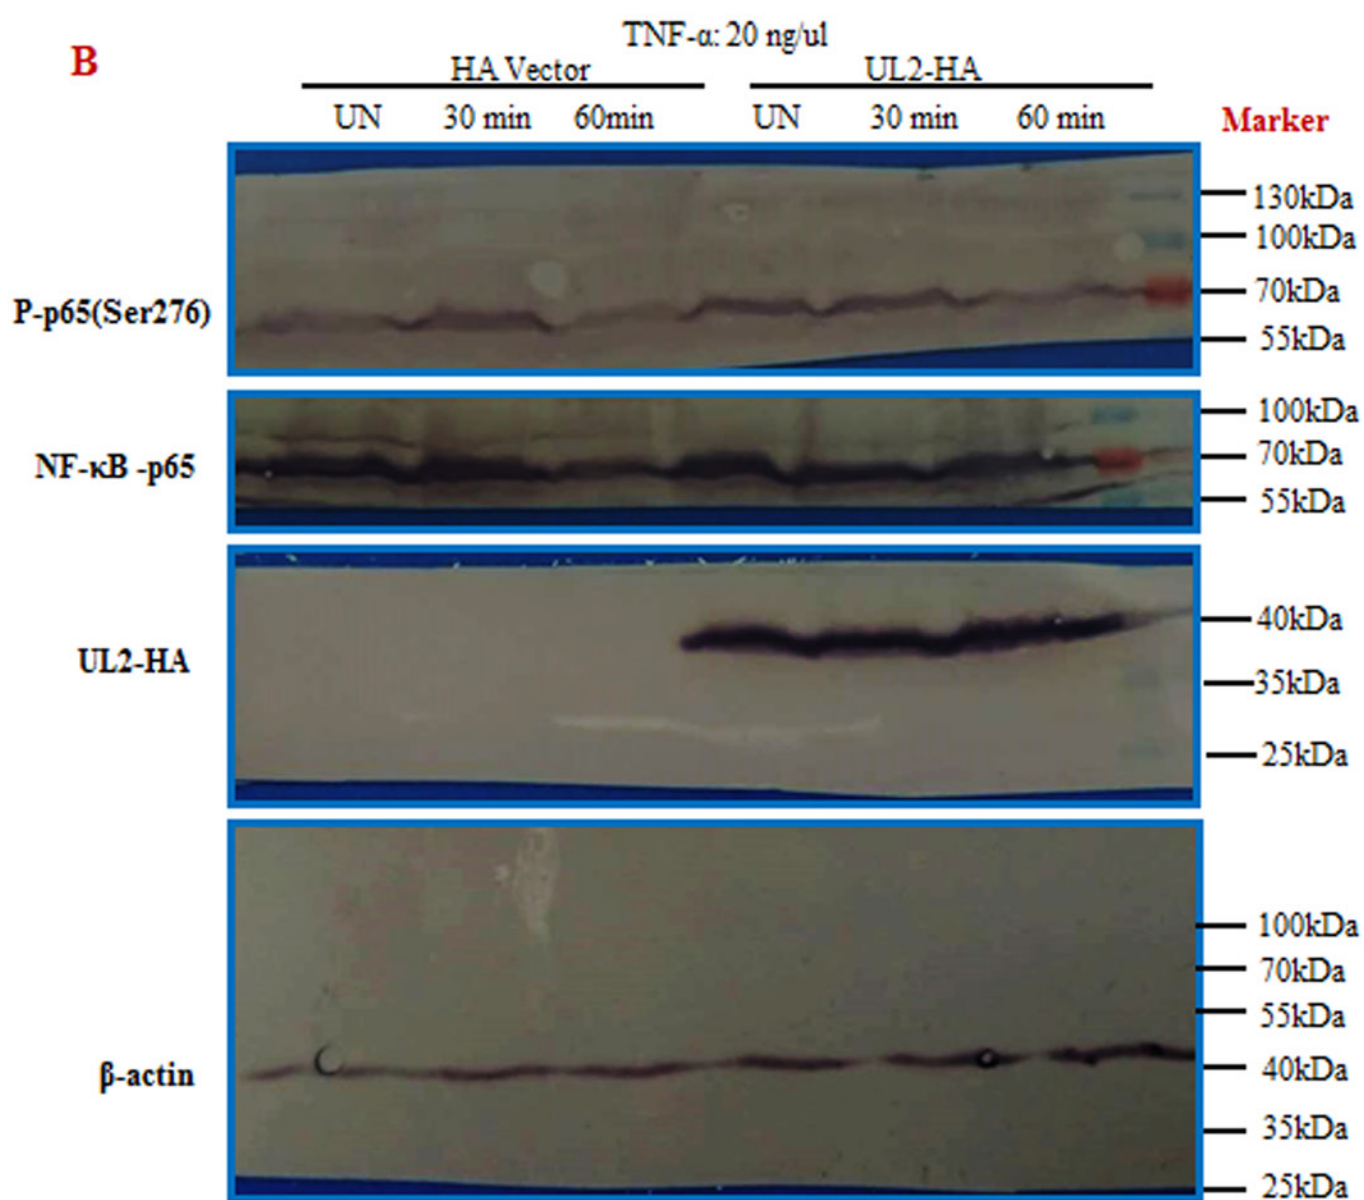

Supplement: Data_Sheet_1.pdf [file Data_Sheet_1.pdf]
